# Supplementary material for: Pregnant Women’s Views on the Feasibility and Acceptability of Web-Based Mental Health E-Screening Versus Paper-Based Screening: A Randomized Controlled Trial
Source: PubMed Central journal article supplement (PMC5400885; doi:10.2196/jmir.6866), 2017-04-07
Supplement: jmir_v19i4e88_app1.pdf [file jmir_v19i4e88_app1.pdf]

Mail - Marie Lane-Smith - x IMPACT Study (2015) | REI x

https://redcap.ualberta.ca/redcap\_v6.15.0/DataEntry/index.php?pid=1011&id=Test&event\_id=4010&page=impact\_study\_base

### Part A: Emotional Health

In the **past 7 days**, I have been able to laugh and see the funny side of things

\* must provide value

- As much as I always could
- Not quite so much now
- Definitely not so much now
- Not at all

reset

In the **past 7 days**, I have looked forward with enjoyment to things

\* must provide value

- As much as I ever did
- Rather less than I used to
- Definitely less than I used to
- Hardly at all

reset

In the **past 7 days**, I have blamed myself unnecessarily when things went wrong

\* must provide value

- Yes, most of the time
- Yes, some of the time
- Not very often
- No, never

reset

In the **past 7 days**, I have been anxious or worried for no good reason

\* must provide value

- No, not at all

reset

[The REDCap Consortium](#) | [Citing REDCap](#) | [Faculty of Medicine](#) | [Women & Children's Health Research Institute](#)  
[The EPICORE Centre](#)

Faculty of Medicine & Dentistry, 2J2.00, WC Mackenzie Health Sciences Centre, Edmonton, Alberta T6G 2R7

REDCap 6.15.0 - © 2016 Vanderbilt University

Save Record  
Save and Continue  
Save and go to Ne  
Save and Mark R

10:15 PM  
2016-08-02

Mail - Marie Lane-Smith - x IMPACT Study (2015) | REI x

https://redcap.ualberta.ca/redcap\_v6.15.0/DataEntry/index.php?pid=1011&id=Test&event\_id=4010&page=impact\_study\_base

- Not very often
- No, never

In the **past 7 days**, I have been anxious or worried for no good reason

\* must provide value

- No, not at all
- Hardly ever
- Yes, sometimes
- Yes, very often

reset

In the **past 7 days**, I have felt scared or panicky for no very good reason.

\* must provide value

- Yes, quite a lot
- Yes, sometimes
- No, not much
- No, not at all

reset

In the **past 7 days**, things have been getting on top of me.

\* must provide value

- Yes, most of the time I haven't been able to cope at all
- Yes, sometimes I haven't been coping as well as usual
- No, most of the time I have coped quite well
- No, I have been coping as well as ever

reset

In the **past 7 days**, I have been so unhappy that I have had difficulty sleeping.

reset

[The REDCap Consortium](#) | [Citing REDCap](#) | [Faculty of Medicine](#) | [Women & Children's Health Research Institute](#)  
[The EPICORE Centre](#)

Faculty of Medicine & Dentistry, 2J2.00, WC Mackenzie Health Sciences Centre, Edmonton, Alberta T6G 2R7

REDCap 6.15.0 - © 2016 Vanderbilt University

Save Record  
Save and Continue  
Save and go to Ne  
Save and Mark R

10:16 PM  
2016-08-02

Mail - Marie Lane-Smith x IMPACT Study (2015) | RE: x

https://redcap.ualberta.ca/redcap\_v6.15.0/DataEntry/index.php?pid=1011&id=Test&event\_id=4010&page=impact\_study\_base

**In the past 7 days, I have been so unhappy that I have had difficulty sleeping.**  
\* must provide value

- Yes, quite a lot
- Yes, sometimes
- Not very often
- No, not at all

reset

**In the past 7 days, I have felt sad or miserable**  
\* must provide value

- Yes, most of the time
- Yes, quite often
- Not very often
- No, not at all

reset

**In the past 7 days, I have been so unhappy that I have been crying.**  
\* must provide value

- Yes, most of the time
- Yes, quite often
- Only occasionally
- No, never

reset

**In the past 7 days, the thought of harming myself has occurred to me.**  
\* must provide value

- Yes, quite often
- Sometimes
- Hardly ever
- Never

reset

[The REDCap Consortium](#) | [Citing REDCap](#) | [Faculty of Medicine](#) | [Women & Children's Health Research Institute](#)  
[The EPICORE Centre](#)

REDCap 6.15.0 - © 2016 Vanderbilt University  
Faculty of Medicine & Dentistry, 2J2.00, WC Mackenzie Health Sciences Centre, Edmonton, Alberta T6G 2R7

Save Record  
Save and Continue  
Save and go to Ne  
Save and Mark R

10:17 PM  
2016-08-02

Mail - Marie Lane-Smith x IMPACT Study (2015) | RE: x

https://redcap.ualberta.ca/redcap\_v6.15.0/DataEntry/index.php?pid=1011&id=Test&event\_id=4010&page=impact\_study\_base

**In the past 7 days, I have been so unhappy that I have been crying.**  
\* must provide value

- Yes, most of the time
- Yes, quite often
- Only occasionally
- No, never

reset

**In the past 7 days, the thought of harming myself has occurred to me.**  
\* must provide value

- Yes, quite often
- Sometimes
- Hardly ever
- Never

reset

**In the past week, have you sometimes felt hopeless about the future?**  
\* must provide value

- Yes
- No

reset

**In the past week, have you sometimes wished you were dead?**  
\* must provide value

- Yes
- No

reset

**In the past week, have you sometimes thought of ending your life?**  
\* must provide value

- Yes
- No

reset

[The REDCap Consortium](#) | [Citing REDCap](#) | [Faculty of Medicine](#) | [Women & Children's Health Research Institute](#)  
[The EPICORE Centre](#)

REDCap 6.15.0 - © 2016 Vanderbilt University  
Faculty of Medicine & Dentistry, 2J2.00, WC Mackenzie Health Sciences Centre, Edmonton, Alberta T6G 2R7

Save Record  
Save and Continue  
Save and go to Ne  
Save and Mark R

10:17 PM  
2016-08-02
